# Supplementary material for: p-MoS2/n-InSe van der Waals heterojunctions and their applications in all-2D optoelectronic devices
Source: Royal Society of Chemistry journal article supplement (doi:10.1039/c9ra06667e), 2019-01-01
Supplement: c9ra06667e1.pdf [file c9ra06667e1.pdf]

*Electronic supplementary Information for*

## ***p*-MoS<sub>2</sub>/*n*-InSe van der Waals heterojunctions and their applications in all-2D optoelectronic devices**

Pan Li, Kai Yuan, Der-Yuh Lin, Tingting Wang, Wanying Du, Zhongming Wei, Kenji Watanabe, Takashi Taniguchi, Yu Ye\* and Lun Dai\*

\* To whom correspondence should be addressed. E-mail: ye\_yu@pku.edu.cn, [lundai@pku.edu.cn](mailto:lundai@pku.edu.cn)

### **S1. The electron mobility ( $\mu_e$ ) and concentration ( $n_{2D}$ ) of InSe nanoflake.**

The electron mobility of the InSe nanoflake ( $\mu_e$ ) can be estimated from the channel

transconductance ( $g_m$ ) of the FET, which is expressed as: 
$$\mu_e = g_m \left[ \frac{L^2}{(C_g V_{ds})} \right],$$
 and

$g_m = \frac{\partial I_{ds}}{\partial V_g}$ , where  $L$  is the channel length,  $C_g$  is the gate capacitance. The  $C_g$  can be

expressed as:  $C_g = \varepsilon \varepsilon_0 L \cdot \frac{W}{h}$ , where  $\varepsilon$  and  $h$  are the dielectric constant and thickness of SiO<sub>2</sub>, and  $W$  is the channel width. The  $g_m$  was obtained to be 3.6  $\mu\text{A/V}$  by fitting the liner part of the  $I_{ds}$  versus  $V_{gs}$  curve of the InSe FET (Fig. 2b) at  $V_{ds} = 0.5$  V,  $C_g$  is  $8.68 \times 10^{-16}$  F at  $L = 1.85$   $\mu\text{m}$ ,  $W = 3.86$   $\mu\text{m}$ ,  $h = 285$  nm. Thus, we obtain an electron mobility ( $\mu_e$ ) of about 285  $\text{cm}^2/\text{V}\cdot\text{s}$ . Electron concentration ( $n_{2D}$ ) can be estimated

from the expression:  $n_{2D} = \frac{L}{WR\mu_e q}$ , where  $R$  and  $q$  are channel resistance and

electron charge, respectively. According to the  $I_{ds}$  vs  $V_{ds}$  curves (Fig. 2a in manuscript), at  $V_{gs} = 30$  V, and 40 V when the channel was turned on, we obtain  $n_{2D} = 2.19 \times 10^{12}$   $\text{cm}^{-2}$ , and  $3.32 \times 10^{12}$   $\text{cm}^{-2}$ , respectively.

### **S2. The hole mobility ( $\mu_h$ ) and concentration ( $p_{2D}$ ) of MoS<sub>2</sub> nanoflake**

The hole mobility ( $\mu_h$ ) of MoS<sub>2</sub> nanoflake can be estimated from the channel

transconductance ( $g_m$ ) of the FET, which is expressed as:  $\mu_h = g_m \left[ \frac{L^2}{(C_g V_{ds})} \right]$ , and

$g_m = \frac{\partial I_{ds}}{\partial V_g}$ , where  $L$  is the channel length,  $C_g$  is the gate capacitance. The  $C_g$  can be

expressed as:  $C_g = \varepsilon \varepsilon_0 L \cdot \frac{W}{h}$ , where  $\varepsilon$  and  $h$  is the dielectric constant and thickness of

SiO<sub>2</sub>,  $W$  is the channel width respectively. The  $g_m$  was obtained to be 52 nA/V by fitting the liner part of the  $I_{ds}$  versus  $V_{gs}$  curve of the MoS<sub>2</sub> FET (Fig. 2d) at  $V_{ds} = 0.5$  V,  $C_g$  is  $2.16 \times 10^{-15}$  F at  $L = 1.9 \mu\text{m}$ ,  $W = 9.4 \mu\text{m}$ ,  $h = 285$  nm. Thus, we obtained hole mobility ( $\mu_h$ ) of about  $1.7 \text{ cm}^2/\text{V}\cdot\text{s}$ . Hole concentration ( $p_{2D}$ ) can be estimated from

the expression:  $p_{2D} = \frac{L}{WR\mu_h q}$ , where  $R$  and  $q$  are channel resistance and electron charge, respectively. According to the  $I_{ds}$  vs  $V_{ds}$  curves at zero back gate (Fig. 2c in the manuscript), we obtain  $p_{2D} = 3.03 \times 10^{13} \text{ cm}^{-2}$ .

### **S3. Comparison of hBN encapsulated and non-encapsulated InSe samples.**

The encapsulated InSe FET shows negligible hysteresis loop in the transfer curves. However, the non-encapsulated InSe FET shows larger hysteresis loop in the transfer curves (Fig. S1), because of the molecules absorption/desorption at the exposed surfaces. The highest on-current achieved under 40 V back gate is about 1  $\mu\text{A}$ , which is two to three orders of magnitude smaller than that of encapsulated sample at same  $V_{ds}$  and  $V_g$ .

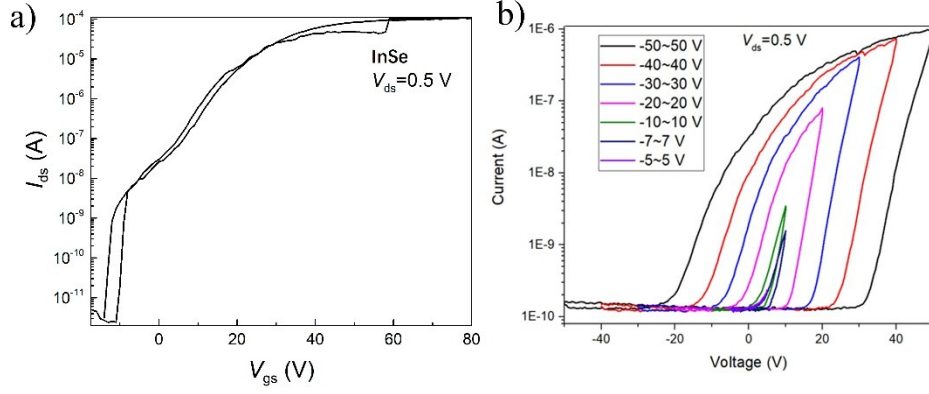

**Fig. S1** The  $I_{ds}$  vs.  $V_{gs}$  curves for an encapsulated (Fig. S1a) and a non-encapsulated (Fig. S1b) InSe FET under different  $V_{gs}$  scanning ranges with  $V_{ds} = 0.5$  V.

#### S4. Determination of the MoS<sub>2</sub>/InSe band alignment

The determination of MoS<sub>2</sub>/InSe band alignment is based on the reported bandgaps, affinities, and measured work functions of MoS<sub>2</sub>/InSe nanoflakes. The reported bandgap value of few-layer MoS<sub>2</sub> is 1.28 eV,<sup>S1, S2</sup> and that of few-layer InSe is 1.22 eV in accordance with our photoluminescence measurement of the InSe nanoflake (Fig. S2). The reported affinity values of MoS<sub>2</sub> and InSe are 4.0 eV<sup>S3, S4</sup> and 4.05 eV,<sup>S4</sup> respectively. The work functions of MoS<sub>2</sub> and InSe are calculated to be 5.31 eV and 4.2 eV, respectively, based on the measured carrier concentrations and reported band structures, by using the following equations:

$$n = n_i e^{(E_F - E_i)/\kappa_B T}, \quad p = n_i e^{(E_i - E_F)/\kappa_B T}, \quad n_i^2 = N_c N_v e^{-\frac{E_c - E_v}{\kappa_B T}},$$

where  $n$  and  $p$  are the carrier concentrations,  $n_i$  is the intrinsic carrier concentration;  $N_c$  and  $N_v$  are the equivalent density of states of conduction and valence bands, respectively;  $\kappa_B$  is the

boltzmann's constant.  $N_c$  and  $N_v$  can be expressed as:

$$N_c = 2 \left( \frac{2\pi m_n \kappa_B T}{h^2} \right)^{3/2},$$

$$N_v = 2 \left( \frac{2\pi m_p \kappa_B T}{h^2} \right)^{3/2},$$

respectively; where  $m_n$  and  $m_p$  are the effective masses of electron and hole, respectively. With that, the MoS<sub>2</sub>/InSe forms a type-II

heterostructure with a barrier between the conduction bands and the valence bands of about 1.16 eV and 1.10 eV, respectively.

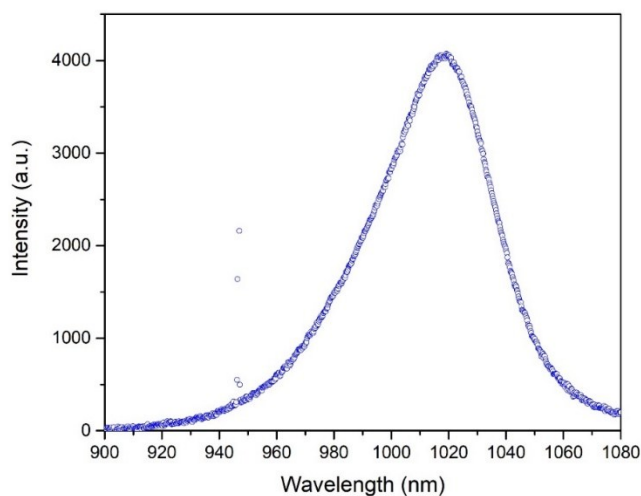

**Fig. S2** Photoluminescence spectrum of the InSe nanoflake with a single emission peak centered at ~1020 nm.

### **S5. Size information of the flakes and heterostructure.**

Before stacking the van der Waals heterostructure, we firstly exfoliated the few-layer InSe and MoS<sub>2</sub> flakes onto the Si/SiO<sub>2</sub> substrates. The thicknesses of the flakes were roughly obtained under the microscope, due to interference from the cavity formed between the flake and substrate interfaces.<sup>S5, S6</sup> In this device, we used a top layer *h*BN of ~10 nm, bottom layer *h*BN of ~30 nm, MoS<sub>2</sub> flake of 10-15 nm, and InSe flake of 10-15 nm, selected through the optical contrast (Fig. S3a-c). After the full assembly of the heterostructure, we conducted the AFM measurements to identify the precise thickness of each layer (Fig. S3e). For one of our heterostructures, the area of the heterostructure was measured to be ~51 μm<sup>2</sup> from the optical image (Fig. S3d). The thicknesses of the MoS<sub>2</sub> and InSe flakes were measured to be 13 nm and 15 nm, respectively.

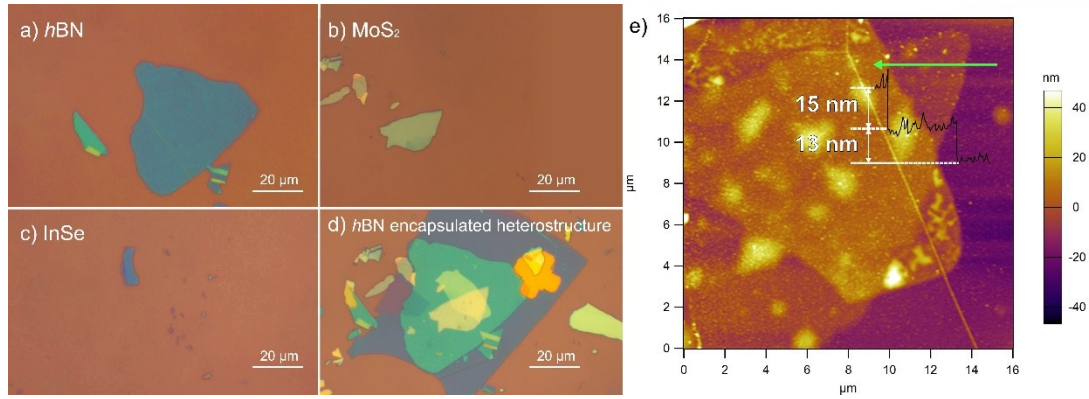

**Fig. S3:** (a-d) The optical images of the bottom *h*BN layer, MoS<sub>2</sub> flake, InSe flake, and fully stacked heterostructure. (e) The AFM height image of stacked heterostructure. The green arrow represents the measured thickness of MoS<sub>2</sub> and InSe flakes of 13 nm and 15 nm, respectively.

### S6. Dry transfer method.

A piece of adhesive tape with a hole in the center was first adhered to a silicon chip. Subsequently, the silicon chip was coated with polypropylene carbonate (PPC, Sigma-Aldrich, CAS 25511-85-7) at 2000 rpm. The tape with a PPC thin film was manually peeled from the silicon substrate and placed onto a transparent elastomer stamp (polydimethylsiloxane, PDMS). The stamp was then affixed to a glass slide, which was attached to a micromanipulator with the PPC film side down.

Then, the transfer processes are shown in Fig. S4. First, PPC slowly wraps the entire sample from one side of the sample at 40 °C, then we picked up the previously exfoliated top-*h*BN and MoS<sub>2</sub> flake in sequence from Si/SiO<sub>2</sub> substrate by PPC at room temperature (Fig. S4a, b). 1 min 90 °C anneal of the glass slide with the stamp and sample on top after each pick-up process is necessary to make the sample smooth. To avoid the degradation of InSe, the InSe related exfoliation and transfer processes were done in a glove box (O<sub>2</sub>, H<sub>2</sub>O < 0.1 ppm) (Fig. S4c-e). The selected InSe nanoflake was picked up by the previously picked top-*h*BN/MoS<sub>2</sub> heterostructure on PPC (Fig. S4c) and transferred onto another *h*BN nanoflake on Si/SiO<sub>2</sub> substrate (Fig. S4d). The *h*BN encapsulated heterostructure was detached from PDMS/PPC at 60 °C and left on the device substrate (Fig. S4e).

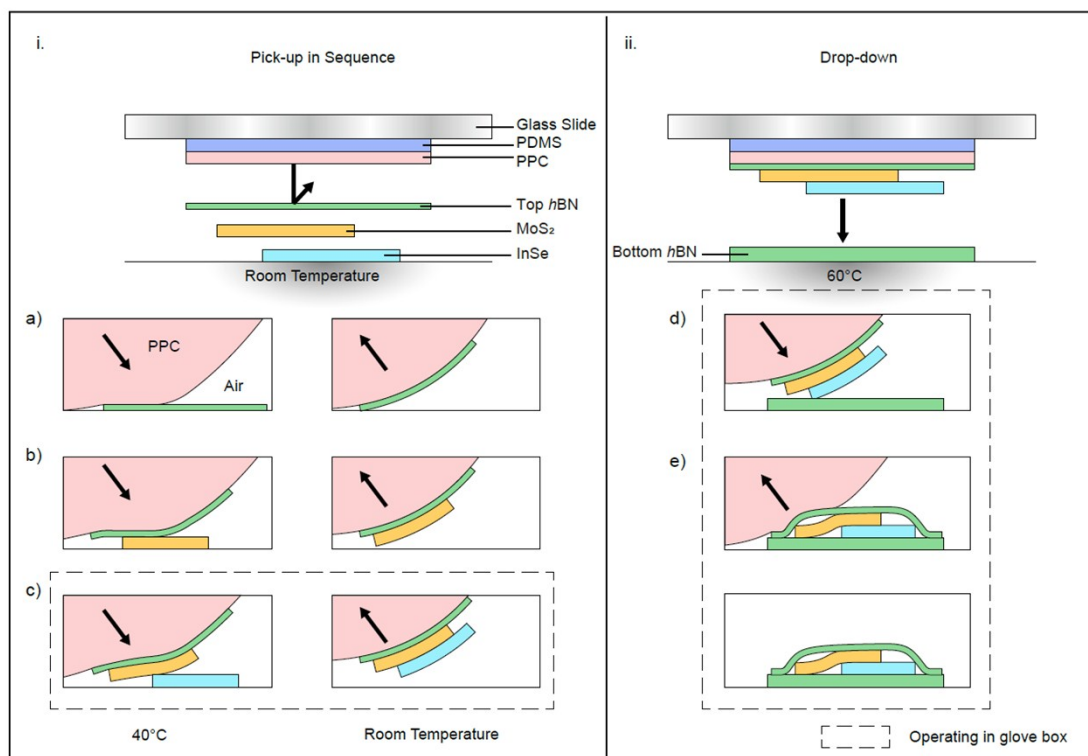

**Fig. S4:** The schematic diagram for the dry transfer method. (i) Picking the top-*h*BN/MoS<sub>2</sub>/InSe flakes in sequence from Si/SiO<sub>2</sub> substrate by PPC. (ii) Putting the PPC with top-*h*BN/MoS<sub>2</sub>/InSe heterostructure facing down onto the bottom-*h*BN on Si/SiO<sub>2</sub> substrate. Then PPC was lifted off slowly. Finally, the *h*BN encapsulated heterostructure was left on the device substrate.

## References:

- S1 S. Han, H. Kwon, S. K. Kim, S. Ryu, W. S. Yun, D. Kim, J. Hwang, J.-S. Kang, J. Baik and H. Shin, *Physical Review B*, 2011, **84**, 045409.
- S2 H. Li, J. Wu, Z. Yin and H. Zhang, *Accounts of chemical research*, 2014, **47**, 1067-1075.
- S3 S. Das, H.-Y. Chen, A. V. Penumatcha and J. Appenzeller, *Nano Lett.*, 2012, **13**, 100-105.
- S4 W. Feng, X. Zhou, W. Q. Tian, W. Zheng and P. Hu, *Physical Chemistry Chemical Physics*, 2015, **17**, 3653-3658.
- S5 K. Novoselov, D. Jiang, F. Schedin, T. Booth, V. Khotkevich, S. Morozov and A. Geim, *Proceedings of the National Academy of Sciences of the United States of America*, 2005, **102**, 10451-104
- S6 H. Li, Z. Yin, Q. He, H. Li, X. Huang, G. Lu, D. W. H. Fam, A. I. Y. Tok, Q. Zhang

and H. Zhang, *small*, 2012, **8**, 63-67.
